# Supplementary material
Source: PubMed Central journal article supplement (PMC4104326)
Supplement: npp201457x1.pdf [file npp201457x1.pdf]

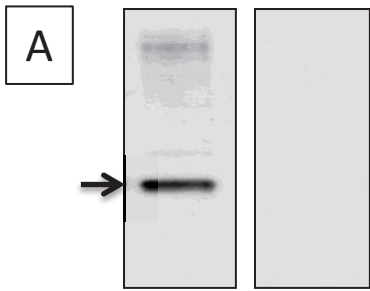

**B**

| Dx | response  | APD | ARS  | PMI hrs | pH   | Freezer time yrs | EtOH | smoking | Illness onset | Illness length | suicide |
|----|-----------|-----|------|---------|------|------------------|------|---------|---------------|----------------|---------|
| NC | na        | na  | 41BM | 14      | 6.68 | 8                | no   | yes     | na            | na             | na      |
| SZ | responder | T   | 32WM | 21      | 6.70 | 17               | no   | unk     | 21            | 11             | no      |
| SZ | responder | T   | 42BM | 21      | 6.25 | 15               | no   | yes     | 23            | 19             | no      |
| SZ | TR        | A   | 48WF | 21      | unk  | 16               | no   | yes     | 27            | 21             | no      |
| SZ | TR        | A   | 52BM | 5       | 7.05 | 15               | no   | yes     | 23            | 29             | no      |
| SZ | TR        | T   | 42WF | 10      | unk  | 23               | unk  | yes     | 30            | 12             | yes     |

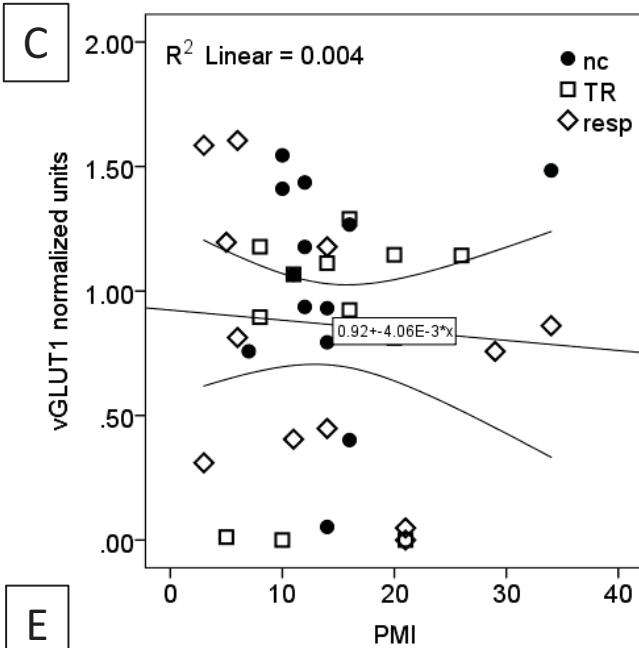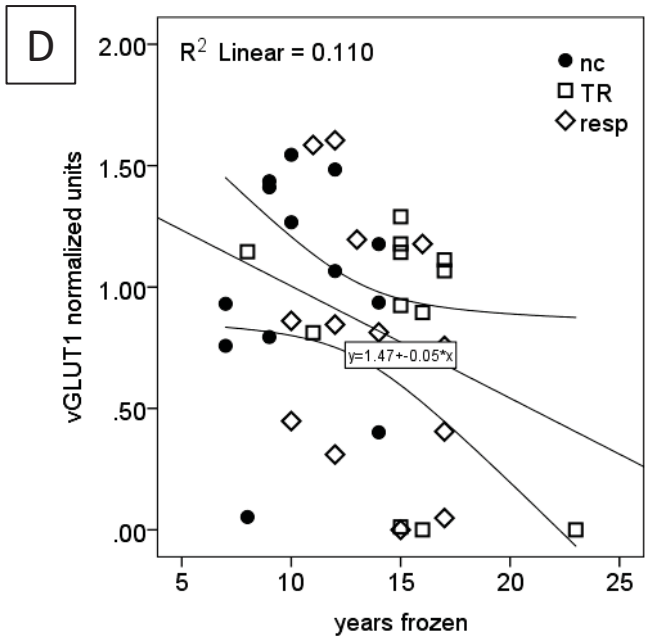

**E**

| vGlut &      |     | all          | NC    | SZ     | TR     | responder | typical | atypical |
|--------------|-----|--------------|-------|--------|--------|-----------|---------|----------|
| PMI          | P<  | 0.704        | 0.599 | 0.521  | 0.442  | 0.243     | 0.538   | 0.676    |
|              | PC= | 0.064        | 0.161 | -0.135 | 0.246  | -0.349    | -0.208  | -0.135   |
| Years frozen | P<  | <b>0.042</b> | 0.766 | 0.065  | 0.159  | 0.217     | 0.073   | 0.368    |
|              | PC= | -0.331       | 0.091 | -0.375 | -0.434 | -0.368    | -0.561  | -0.286   |
| Nicotine     | P<  | 0.821        | 0.342 | 0.963  | na     | 0.936     | na      | 0.960    |
|              | PC= | -0.047       | 0.330 | -0.012 | na     | -0.034    | na      | 0.02     |
